# Supplementary material for: The role of cognitive distortion in criminal behavior: a systematic literature review
Source: PubMed Central journal article supplement — BMC Psychol. 2024 Dec 18;12:741. doi: 10.1186/s40359-024-02228-0 (PMC11657739; doi:10.1186/s40359-024-02228-0), 2024-12-18
Supplement: 40359_2024_2228_MOESM2_ESM.pdf [file 40359_2024_2228_MOESM2_ESM.pdf]

## ROBIS: Tool to assess risk of bias in systematic reviews

### Phase 1: Assessing relevance (Optional)

ROBIS is designed to assess the risk of bias in reviews with questions relating to interventions, aetiology, diagnosis and prognosis. State your overview/guideline question (target question) and the question being addressed in the review being assessed:

#### Intervention reviews:

| Category                | Target question (e.g. overview or guideline) | Review being assessed |
|-------------------------|----------------------------------------------|-----------------------|
| Patients/Population(s): |                                              |                       |
| Intervention(s):        |                                              |                       |
| Comparator(s):          |                                              |                       |
| Outcome(s):             |                                              |                       |

#### For aetiology reviews:

| Category                       | Target question (e.g. overview or guideline) | Review being assessed |
|--------------------------------|----------------------------------------------|-----------------------|
| Patients/Population(s):        |                                              |                       |
| Exposure(s) and comparator(s): |                                              |                       |
| Outcome(s):                    |                                              |                       |

#### For DTA reviews:

| Category            | Target question (e.g. overview or guideline) | Review being assessed |
|---------------------|----------------------------------------------|-----------------------|
| Patients):          |                                              |                       |
| Index test(s):      |                                              |                       |
| Reference standard: |                                              |                       |
| Target condition:   |                                              |                       |

#### For prognostic reviews:

| Category                 | Target question (e.g. overview or guideline) | Review being assessed |
|--------------------------|----------------------------------------------|-----------------------|
| Patients:                |                                              |                       |
| Outcome to be predicted: |                                              |                       |
| Intended use of model:   |                                              |                       |
| Intended moment in time: |                                              |                       |

Does the question addressed by the review match the target question?

YES/NO/UNCLEAR

## Phase 2: Identifying concerns with the review process

### DOMAIN 1: STUDY ELIGIBILITY CRITERIA

Describe the study eligibility criteria, any restrictions on eligibility and whether there was evidence that objectives and eligibility criteria were pre-specified:

- |                                                                                                                                                                    |                      |
|--------------------------------------------------------------------------------------------------------------------------------------------------------------------|----------------------|
| 1.1 Did the review adhere to pre-defined objectives and eligibility criteria?                                                                                      | <u>Y</u> /PY/PN/N/NI |
| 1.2 Were the eligibility criteria appropriate for the review question?                                                                                             | <u>Y</u> /PY/PN/N/NI |
| 1.3 Were eligibility criteria unambiguous?                                                                                                                         | <u>Y</u> /PY/PN/N/NI |
| 1.4 Were any restrictions in eligibility criteria based on study characteristics appropriate (e.g. date, sample size, study quality, outcomes measured)?           | <u>Y</u> /PY/PN/N/NI |
| 1.5 Were any restrictions in eligibility criteria based on sources of information appropriate (e.g. publication status or format, language, availability of data)? | <u>Y</u> /PY/PN/N/NI |

Concerns regarding specification of study eligibility criteria LOW/HIGH/UNCLEAR

Rationale for concern: The specification of study eligibility criteria is foundational to the systematic review process, as it determines which studies are included or excluded from the analysis. In this case, our assessment indicates a low level of concern regarding bias in the specification of eligibility criteria.

### DOMAIN 2: IDENTIFICATION AND SELECTION OF STUDIES

Describe methods of study identification and selection (e.g. number of reviewers involved):

- |                                                                                                                        |                       |
|------------------------------------------------------------------------------------------------------------------------|-----------------------|
| 2.1 Did the search include an appropriate range of databases/electronic sources for published and unpublished reports? | <u>Y</u> /PY/PN/N/NI  |
| 2.2 Were methods additional to database searching used to identify relevant reports?                                   | Y/PY/PN/ <u>N</u> /NI |
| 2.3 Were the terms and structure of the search strategy likely to retrieve as many eligible studies as possible?       | <u>Y</u> /PY/PN/N/NI  |
| 2.4 Were restrictions based on date, publication format, or language appropriate?                                      | <u>Y</u> /PY/PN/N/NI  |
| 2.5 Were efforts made to minimise error in selection of studies?                                                       | <u>Y</u> /PY/PN/N/NI  |

Concerns regarding methods used to identify and/or select studies LOW/HIGH/UNCLEAR

Rationale for concern: The systematic review employed clear and well-defined criteria for study inclusion, ensuring consistency in the selection process. The search strategy was comprehensive, covering multiple databases with appropriate search terms. Screening of studies was conducted independently by multiple reviewers, with any discrepancies resolved through consensus or third-party arbitration.

### DOMAIN 3: DATA COLLECTION AND STUDY APPRAISAL

Describe methods of data collection, what data were extracted from studies or collected through other means, how risk of bias was assessed (e.g. number of reviewers involved) and the tool used to assess risk of bias:

- |                                                                                                                              |                       |
|------------------------------------------------------------------------------------------------------------------------------|-----------------------|
| 3.1 Were efforts made to minimise error in data collection?                                                                  | Y/ <u>PY</u> /PN/N/NI |
| 3.2 Were sufficient study characteristics available for both review authors and readers to be able to interpret the results? | Y/ <u>PY</u> /PN/N/NI |
| 3.3 Were all relevant study results collected for use in the synthesis?                                                      | <u>Y</u> /PY/PN/N/NI  |
| 3.4 Was risk of bias (or methodological quality) formally assessed using appropriate criteria?                               | Y/PY/PN/N/ <u>NI</u>  |
| 3.5 Were efforts made to minimise error in risk of bias assessment?                                                          | <u>Y</u> /PY/PN/N/NI  |

Concerns regarding methods used to collect data and appraise studies LOW/HIGH/UNCLEAR

Rationale for concern: The inclusion of diverse study designs in the systematic review introduces challenges in uniformly appraising study quality. While levels of evidence were utilized, their applicability across different designs is unclear, potentially leading to inconsistencies in the assessment process.

## DOMAIN 4: SYNTHESIS AND FINDINGS

Describe synthesis methods:

|                                                                                                                                                  |                      |
|--------------------------------------------------------------------------------------------------------------------------------------------------|----------------------|
| 4.1 Did the synthesis include all studies that it should?                                                                                        | <u>Y</u> /PY/PN/N/NI |
| 4.2 Were all pre-defined analyses reported or departures explained?                                                                              | <u>Y</u> /PY/PN/N/NI |
| 4.3 Was the synthesis appropriate given the nature and similarity in the research questions, study designs and outcomes across included studies? | <u>Y</u> /PY/PN/N/NI |
| 4.4 Was between-study variation (heterogeneity) minimal or addressed in the synthesis?                                                           | Y/PY/PN/N/ <u>NI</u> |
| 4.5 Were the findings robust, e.g. as demonstrated through funnel plot or sensitivity analyses?                                                  | <u>Y</u> /PY/PN/N/NI |
| 4.6 Were biases in primary studies minimal or addressed in the synthesis?                                                                        | <u>Y</u> /PY/PN/N/NI |

Concerns regarding the synthesis and findings

LOW/HIGH/UNCLEAR

Rationale for concern:

Y=YES, PY=PROBABLY YES, PN=PROBABLY NO, N=NO, NI=NO INFORMATION

### Phase 3: Judging risk of bias

Summarize the concerns identified during the Phase 2 assessment:

| Domain                                                                  | Concern | Rationale for concern                                                                                                                                                                                                                                  |
|-------------------------------------------------------------------------|---------|--------------------------------------------------------------------------------------------------------------------------------------------------------------------------------------------------------------------------------------------------------|
| 1. Concerns regarding specification of study eligibility criteria       | Low     | The criteria were clearly defined and sufficiently detailed, minimizing ambiguity in the selection process.                                                                                                                                            |
| 2. Concerns regarding methods used to identify and/or select studies    | Low     | The criteria for study inclusion were clearly defined and applied consistently. The search strategy was comprehensive and systematic encompassing multiple databases and employing appropriate search terms.                                           |
| 3. Concerns regarding methods used to collect data and appraise studies | Unclear | Our assessment of the systematic review process raised concerns regarding the clarity and consistency of methods used to collect data. One notable challenge was the heterogeneous nature of the included studies, encompassing various study designs. |
| 4. Concerns regarding the synthesis and findings                        | Low     | The synthesis process was conducted rigorously, with transparent methods and clear reporting. The findings of the review are well-supported by the included studies, and there is confidence in the overall conclusions drawn.                         |

### RISK OF BIAS IN THE REVIEW

Describe whether conclusions were supported by the evidence:

|                                                                                                        |                      |
|--------------------------------------------------------------------------------------------------------|----------------------|
| A. Did the interpretation of findings address all of the concerns identified in Domains 1 to 4?        | <u>Y</u> /PY/PN/N/NI |
| B. Was the relevance of identified studies to the review's research question appropriately considered? | <u>Y</u> /PY/PN/N/NI |
| C. Did the reviewers avoid emphasizing results on the basis of their statistical significance?         | Y/PY/PN/N/ <u>NI</u> |

Risk of bias in the review

RISK: LOW/HIGH/UNCLEAR

Rationale for risk: In Phase 3, we judged the overall risk of bias in the systematic review to be low. Our assessment considered the clarity and relevance of the research question and inclusion criteria (Phase 1), as well as the rigor and transparency of the review process (Phase 2). Based on our evaluation of these factors, we determined that the risk of bias in the review is low, indicating a high level of confidence in the validity and reliability of the review findings.

Y=YES, PY=PROBABLY YES, PN=PROBABLY NO, N=NO, NI=NO INFORMATION
